# Supplementary material for: Screening and Identifying a Novel ssDNA Aptamer against Alpha-fetoprotein Using CE-SELEX
Source: PubMed Central journal article supplement (PMC4620443; doi:10.1038/srep15552), 2015-10-26

# Screening and Identifying a Novel ssDNA Aptamer against Alpha-fetoprotein Using CE-SELEX

Lili Dong<sup>1\*</sup>, Qiwen Tan<sup>2\*</sup>, Wei Ye<sup>3</sup>, Dongli Liu<sup>1</sup>, Haifeng Chen<sup>3</sup>, Hongwei Hu<sup>4</sup>, Duo Wen<sup>1</sup>, Yang Liu<sup>1</sup>, Ya Cao<sup>5</sup>, Jingwu Kang<sup>6</sup>, Jia Fan<sup>1,7</sup>, Wei Guo<sup>2§</sup>, Weizhong Wu<sup>1§</sup>

<sup>1</sup> Liver Cancer Institute, Zhongshan Hospital, Fudan University, Key Laboratory of Carcinogenesis and Cancer Invasion, Ministry of Education, Shanghai 200032, China.

<sup>2</sup> Department of Laboratory Medicine, Zhongshan Hospital, Fudan University, Shanghai 200032, China.

<sup>3</sup> School of Life Sciences and Biotechnology, Shanghai Jiao Tong University, Shanghai 200240, China.

<sup>4</sup> Shanghai Aijin Biochemical Science & Technology Co. Ltd., Shanghai 200336, China.

<sup>5</sup> Cancer Research Institute, Xiangya School of Medicine, Central South University, Key Laboratory of Chinese Ministry of Education, Changsha 410078, China.

<sup>6</sup> Shanghai Institute of Organic Chemistry, Chinese Academy of Sciences, Shanghai 200032, China.

<sup>7</sup> Institute of Biomedical Sciences, Fudan University, Shanghai 200032, China

**\*Lili Dong and Qiwen Tan contributed equally to this work.**

**§Correspondence should be sent to Weizhong Wu.**

Tel & Fax: +86-21-54237181; E-mail: [wu.weizhong@zs-hospital.sh.cn](mailto:wu.weizhong@zs-hospital.sh.cn)

**Correspondence may also be addressed to Wei Guo.**

Tel & Fax: +86-21-64041990-2376; E-mail: [guo.wei@zs-hospital.sh.cn](mailto:guo.wei@zs-hospital.sh.cn)

|       |                      |                                         |                     |    |
|-------|----------------------|-----------------------------------------|---------------------|----|
| AP201 | GTGACGCTCCTAACGCTGAC | ATAGCGGTAA. GTTCCACACTCCATCACTTCGGC     | CTGTCCGTCCGAACCAATC | 75 |
| AP202 | GTGACGCTCCTAACGCTGAC | GGTCTTTTCC. CTGACTTAATCTCATCTTTTCCGGC   | CTGTCCGTCCGAACCAATC | 75 |
| AP204 | GTGACGCTCCTAACGCTGAC | AACGGACGAT. CAAATCTCTATAGGCTGATTATAC    | CTGTCCGTCCGAACCAATC | 75 |
| AP205 | GTGACGCTCCTAACGCTGAC | GGCGGTGCAT. GATCCCTAGGACAGGGTTTCCAGC    | CTGTCCGTCCGAACCAATC | 75 |
| AP206 | GTGACGCTCCTAACGCTGAC | TTTTAATTCT. TGTTATTGGTATATCCGCCTTGAC    | CTGTCCGTCCGAACCAATC | 75 |
| AP208 | GTGACGCTCCTAACGCTGAC | AGGAACGCC. CCTAGGTACAGAGCAGGAGTGCAT     | CTGTCCGTCCGAACCAATC | 75 |
| AP209 | GTGACGCTCCTAACGCTGAC | ACGTTCATG. CACTGTTGGACCTGTCGGCCTGCC     | CTGTCCGTCCGAACCAATC | 75 |
| AP210 | GTGACGCTCCTAACGCTGAC | CAAGCATGGT. GGGTGTGTCGTCCTCATCTCCTTC    | CTGTCCGTCCGAACCAATC | 75 |
| AP211 | GTGACGCTCCTAACGCTGAC | TTTTTGGGAA. TGCGTATGTATGCTGCCACGTACG    | CTGTCCGTCCGAACCAATC | 75 |
| AP212 | GTGACGCTCCTAACGCTGAC | TAAGTAGTGC. GACTGAAGTCAATGAGAGGTGCGT    | CTGTCCGTCCGAACCAATC | 75 |
| AP214 | GTGACGCTCCTAACGCTGAC | TCACGGGGCC. TACCGAAATCTAGGCTGCCACATG    | CTGTCCGTCCGAACCAATC | 75 |
| AP215 | GTGACGCTCCTAACGCTGAC | TGTATTCTGC. AGTCTTATTCAAGTCGGTCCGAATGAC | CTGTCCGTCCGAACCAATC | 75 |
| AP216 | GTGACGCTCCTAACGCTGAC | GGGAATAACG. TGTAACGTAATAGTGGGTTCACCT    | CTGTCCGTCCGAACCAATC | 75 |
| AP217 | GTGACGCTCCTAACGCTGAC | CGCGAGCCAC. CGACGGACACTCGGAATCCATTATT   | CTGTCCGTCCGAACCAATC | 75 |
| AP218 | GTGACGCTCCTAACGCTGAC | CACAGGTAGG. GACAACATCACATGGGCGTTAGATAC  | CTGTCCGTCCGAACCAATC | 75 |
| AP219 | GTGACGCTCCTAACGCTGAC | CCGCGGTTCC. ATCTTGTATGCCTGTGGATGTTT     | CTGTCCGTCCGAACCAATC | 75 |
| AP220 | GTGACGCTCCTAACGCTGAC | TGTCGGAAAA. TAGCCAACACTTCCGCAGCGTGTGT   | CTGTCCGTCCGAACCAATC | 75 |
| AP221 | GTGACGCTCCTAACGCTGAC | AACACCCTAA. TACCCACGGGTTGCCATACGGGGGT   | CTGTCCGTCCGAACCAATC | 75 |
| AP222 | GTGACGCTCCTAACGCTGAC | GGCACGAAGA. TGCTGTGAGGCCCTTTCGCTGTGCA   | CTGTCCGTCCGAACCAATC | 75 |
| AP223 | GTGACGCTCCTAACGCTGAC | GGCGCATAT. AATTCCGGATGCTGTGCAATGTCC     | CTGTCCGTCCGAACCAATC | 75 |
| AP224 | GTGACGCTCCTAACGCTGAC | CGTCAGTATG. GTTCTTGAAGTATGTGACTGCTGG    | CTGTCCGTCCGAACCAATC | 75 |
| AP225 | GTGACGCTCCTAACGCTGAC | AGGTGACCT. GTTGGAAAGTTAGGCGTCTTAAAC     | CTGTCCGTCCGAACCAATC | 75 |
| AP226 | GTGACGCTCCTAACGCTGAC | AGGTGGGGA. TATCCGACTTCCATAAATACTCGC     | CTGTCCGTCCGAACCAATC | 75 |
| AP227 | GTGACGCTCCTAACGCTGAC | CTGCGGGACG. TGGATTGGCGGATATTGCTCGTCCG   | CTGTCCGTCCGAACCAATC | 75 |
| AP228 | GTGACGCTCCTAACGCTGAC | CTTTTACGTG. GTGGTAGTATACTTTAATGTAATTT   | CTGTCCGTCCGAACCAATC | 75 |
| AP229 | GTGACGCTCCTAACGCTGAC | AGGCAGCCTA. CGGGCTCAGGACTACTCTGATTGCC   | CTGTCCGTCCGAACCAATC | 75 |
| AP230 | GTGACGCTCCTAACGCTGAC | GACACACCTT. CGAAGCCACGAGAATGGATGACT     | CTGTCCGTCCGAACCAATC | 75 |
| AP231 | GTGACGCTCCTAACGCTGAC | AAATGGGCAA. AGCGTCTAAAGAACTTGGTAGGGT    | CTGTCCGTCCGAACCAATC | 75 |
| AP232 | GTGACGCTCCTAACGCTGAC | GGACCATATA. CGCGAACTTACGACGCTCTCTCGTC   | CTGTCCGTCCGAACCAATC | 75 |
| AP233 | GTGACGCTCCTAACGCTGAC | TGTACTTATT. TTTTTCGAAATCACTCGCTTTAATC   | CTGTCCGTCCGAACCAATC | 75 |
| AP234 | GTGACGCTCCTAACGCTGAC | CGGGGCCCAA. GTCATCGTGTAGCCAGGCACGTGAC   | CTGTCCGTCCGAACCAATC | 75 |
| AP236 | GTGACGCTCCTAACGCTGAC | GTAGAGCAGG. GGGCCAAGAAGTATGATATCGCCC    | CTGTCCGTCCGAACCAATC | 75 |
| AP237 | GTGACGCTCCTAACGCTGAC | GGTGGTAAGA. AGTAGCTTACGGCTTGTGTTTAT     | CTGTCCGTCCGAACCAATC | 75 |
| AP238 | GTGACGCTCCTAACGCTGAC | CTGCGCTCGA. CGTAGTCCGCTCGGGAGTACCAGGC   | CTGTCCGTCCGAACCAATC | 75 |
| AP239 | GTGACGCTCCTAACGCTGAC | AGGAGACACA. TCTTAAAGCTGCCACGCCGATCC     | CTGTCCGTCCGAACCAATC | 75 |
| AP240 | GTGACGCTCCTAACGCTGAC | TGAAAGGGG. FTACCTTAAAGGACTAGCGTCACTG    | CTGTCCGTCCGAACCAATC | 75 |
| AP241 | GTGACGCTCCTAACGCTGAC | CGGGGTGAAT. CTCATGCTTACGGGGTTCGACTAG    | CTGTCCGTCCGAACCAATC | 75 |
| AP242 | GTGACGCTCCTAACGCTGAC | ATAGCGCACT. GTAGTAGGGACACCACCTCCGCGAG   | CTGTCCGTCCGAACCAATC | 75 |
| AP243 | GTGACGCTCCTAACGCTGAC | TCGGGGACAT. ACGCGGGCGAAGTGAACGTGTGT     | CTGTCCGTCCGAACCAATC | 75 |
| AP244 | GTGACGCTCCTAACGCTGAC | GGCCCGTCAA. TCCCGCGTACTCATTGGTCCCTTAC   | CTGTCCGTCCGAACCAATC | 75 |
| AP246 | GTGACGCTCCTAACGCTGAC | CAGCACTGTC. GGATTAGCCACTGTTAGTTGGAGCC   | CTGTCCGTCCGAACCAATC | 75 |
| AP248 | GTGACGCTCCTAACGCTGAC | TGTCGTTTGT. TTAGTGGATATTTCTTCTCTCCG     | CTGTCCGTCCGAACCAATC | 75 |
| AP249 | GTGACGCTCCTAACGCTGAC | GTAAGAGCAC. CTTTAAAGTACAGTACATGCCAGGG   | CTGTCCGTCCGAACCAATC | 75 |
| AP250 | GTGACGCTCCTAACGCTGAC | ACAGTTGCTA. AGAGCCGCCCTGAACATACGAGG     | CTGTCCGTCCGAACCAATC | 75 |
| AP251 | GTGACGCTCCTAACGCTGAC | TCAGAACGAC. CCGGTTCTGCTACTGGCTGGTGGG    | CTGTCCGTCCGAACCAATC | 75 |
| AP252 | GTGACGCTCCTAACGCTGAC | CAGCGTACTT. TTGGTTATTACGAGACATAAGCCCG   | CTGTCCGTCCGAACCAATC | 75 |
| AP254 | GTGACGCTCCTAACGCTGAC | TTTGGAGAGG. CGTCGCCATGTTCCACTTAGCGTGG   | CTGTCCGTCCGAACCAATC | 75 |
| AP255 | GTGACGCTCCTAACGCTGAC | TTTGGAGAGG. CGTCGCCATGTTCCGCTTAGCGTGG   | CTGTCCGTCCGAACCAATC | 75 |
| AP256 | GTGACGCTCCTAACGCTGAC | CAAGTGCAT. AATTCCGTCAAATTCGGAAGGTAGG    | CTGTCCGTCCGAACCAATC | 75 |
| AP257 | GTGACGCTCCTAACGCTGAC | GGTCTCAGG. TACCGCCAGCTTGTTCAGACGACT     | CTGTCCGTCCGAACCAATC | 75 |
| AP258 | GTGACGCTCCTAACGCTGAC | GTGGGCGTCG. AATTGTCCGTCGTGATCTGGTCGCAC  | CTGTCCGTCCGAACCAATC | 75 |
| AP260 | GTGACGCTCCTAACGCTGAC | GAGTCAAGTT. ATGTCGTACAGCGGAGCGGATTTCC   | CTGTCCGTCCGAACCAATC | 75 |
| AP261 | GTGACGCTCCTAACGCTGAC | GGCGGGGACC. TTGATCATACTTTCGTTCCGAATCTC  | CTGTCCGTCCGAACCAATC | 75 |
| AP262 | GTGACGCTCCTAACGCTGAC | CAGCGGGATT. ATTCCCTCTTTGGGGCGGATCGACAC  | CTGTCCGTCCGAACCAATC | 75 |
| AP263 | GTGACGCTCCTAACGCTGAC | GAGTTGACTA. CAGATGGGCCTTAGGGTAGCTTTAC   | CTGTCCGTCCGAACCAATC | 75 |
| AP264 | GTGACGCTCCTAACGCTGAC | CATAAGACAT. AGTAGCCCGGATTTAGCTCGGGT     | CTGTCCGTCCGAACCAATC | 75 |
| AP265 | GTGACGCTCCTAACGCTGAC | TAAGTGTGGT. CTAAGCTGTCTCTGGCTCAGTATC    | CTGTCCGTCCGAACCAATC | 75 |
| AP266 | GTGACGCTCCTAACGCTGAC | GGCCCGTTG. GATTACATCCAGGAGCTTAAATTA     | CTGTCCGTCCGAACCAATC | 75 |
| AP267 | GTGACGCTCCTAACGCTGAC | AAATACCTGCG. TTGCTTCTCATGTTGGTCTTTTACAC | CTGTCCGTCCGAACCAATC | 75 |
| AP268 | GTGACGCTCCTAACGCTGAC | CTCTGTAAGA. AAGAGCGTTCTACAGCCATTTACG    | CTGTCCGTCCGAACCAATC | 75 |
| AP270 | GTGACGCTCCTAACGCTGAC | GGGAGATGGT. TACATATTCACTTTC. CAGCATCT   | CTGTCCGTCCGAACCAATC | 75 |
| AP271 | GTGACGCTCCTAACGCTGAC | TGAGCAGTCC. AAGCCACTACATGTTCCGGTATCTTT  | CTGTCCGTCCGAACCAATC | 75 |
| AP272 | GTGACGCTCCTAACGCTGAC | GGTATTCTTA. ACGTCCGCGTGTATTAGTCTTATTGTT | CTGTCCGTCCGAACCAATC | 75 |
| AP273 | GTGACGCTCCTAACGCTGAC | TCAGGTGCAG. TTCTCGACTCGTCTTGTATGTGGGT   | CTGTCCGTCCGAACCAATC | 75 |
| AP274 | GTGACGCTCCTAACGCTGAC | CTGGTGACCT. GCGTTTATATCAGTACAGCCGTCGC   | CTGTCCGTCCGAACCAATC | 75 |
| AP276 | GTGACGCTCCTAACGCTGAC | GCAGGGGCCA. GTTTTGTACGTCATCTGGCGGGCC    | CTGTCCGTCCGAACCAATC | 75 |
| AP277 | GTGACGCTCCTAACGCTGAC | AAC TGGGCTG. CGTCTTCCCGTCTCACTGCAATC    | CTGTCCGTCCGAACCAATC | 75 |
| AP279 | GTGACGCTCCTAACGCTGAC | GTAAGTGTAT. TTGCGCTTCGGATGTATGGATATGT   | CTGTCCGTCCGAACCAATC | 75 |
| AP281 | GTGACGCTCCTAACGCTGAC | GATGGTCAGGACTGGTGAATCAGTTTGT. TGG       | CTGTCCGTCCGAACCAATC | 75 |
| AP282 | GTGACGCTCCTAACGCTGAC | GGCCCTAGTG. ACCTGGGGTTCAGTTCTCGCTCAG    | CTGTCCGTCCGAACCAATC | 75 |
| AP283 | GTGACGCTCCTAACGCTGAC | CAGGGCATTG. CCGGAGCACTAGGGGTAGTCTTGG    | CTGTCCGTCCGAACCAATC | 75 |
| AP284 | GTGACGCTCCTAACGCTGAC | TGTGCACAGC. CTATGCTCAGGCAACTTAGGCAG     | CTGTCCGTCCGAACCAATC | 75 |
| AP285 | GTGACGCTCCTAACGCTGAC | CAGACATTTA. CTGGGATCGATAAAGATCGTCTGAC   | CTGTCCGTCCGAACCAATC | 75 |
| AP287 | GTGACGCTCCTAACGCTGAC | CTTGTAGTGC. GTAGGGATCGAGTACAGACTCAGC    | CTGTCCGTCCGAACCAATC | 75 |
| AP288 | GTGACGCTCCTAACGCTGAC | TGGCGTAAAC. TATGCTGTCTGTAAGTGTGCTCGC    | CTGTCCGTCCGAACCAATC | 75 |
| AP289 | GTGACGCTCCTAACGCTGAC | ATAGGGGGCC. CGGTAGCGTACTTTGAGTTGGAGG    | CTGTCCGTCCGAACCAATC | 75 |
| AP290 | GTGACGCTCCTAACGCTGAC | GGCTGAGAAC. CTGCTGCTTACTTAGACCATCGGT    | CTGTCCGTCCGAACCAATC | 75 |
| AP292 | GTGACGCTCCTAACGCTGAC | GACTTCTGCT. AACACACGGTCAGGCGTTGCTCCTA   | CTGTCCGTCCGAACCAATC | 75 |
| AP293 | GTGACGCTCCTAACGCTGAC | CGCTTCCCT. TATCTTTTCGGGCTAACCCAAATGG    | CTGTCCGTCCGAACCAATC | 75 |
| AP294 | GTGACGCTCCTAACGCTGAC | CTTAGCTGGA. TGCTTTACATGTTCCACCTATTGG    | CTGTCCGTCCGAACCAATC | 75 |
| AP295 | GTGACGCTCCTAACGCTGAC | GGATGTTCCG. ATGGTTATTCAAGAGTGTAAAGC     | CTGTCCGTCCGAACCAATC | 75 |
| AP296 | GTGACGCTCCTAACGCTGAC | GGCTAAGGGT. GAGGGGTGCGCTTCTTGTATGCCTAC  | CTGTCCGTCCGAACCAATC | 75 |
| AP297 | GTGACGCTCCTAACGCTGAC | CGCCAACGAT. TCTTCAACACTACACGTTCTTCTT    | CTGTCCGTCCGAACCAATC | 75 |

Consensus gtgacgctcctaacgctgac

cctgtcgtccgaaccaatc

Supplemental Figure 1. Complete sequence alignment of 83 aptamers using DNAMAN



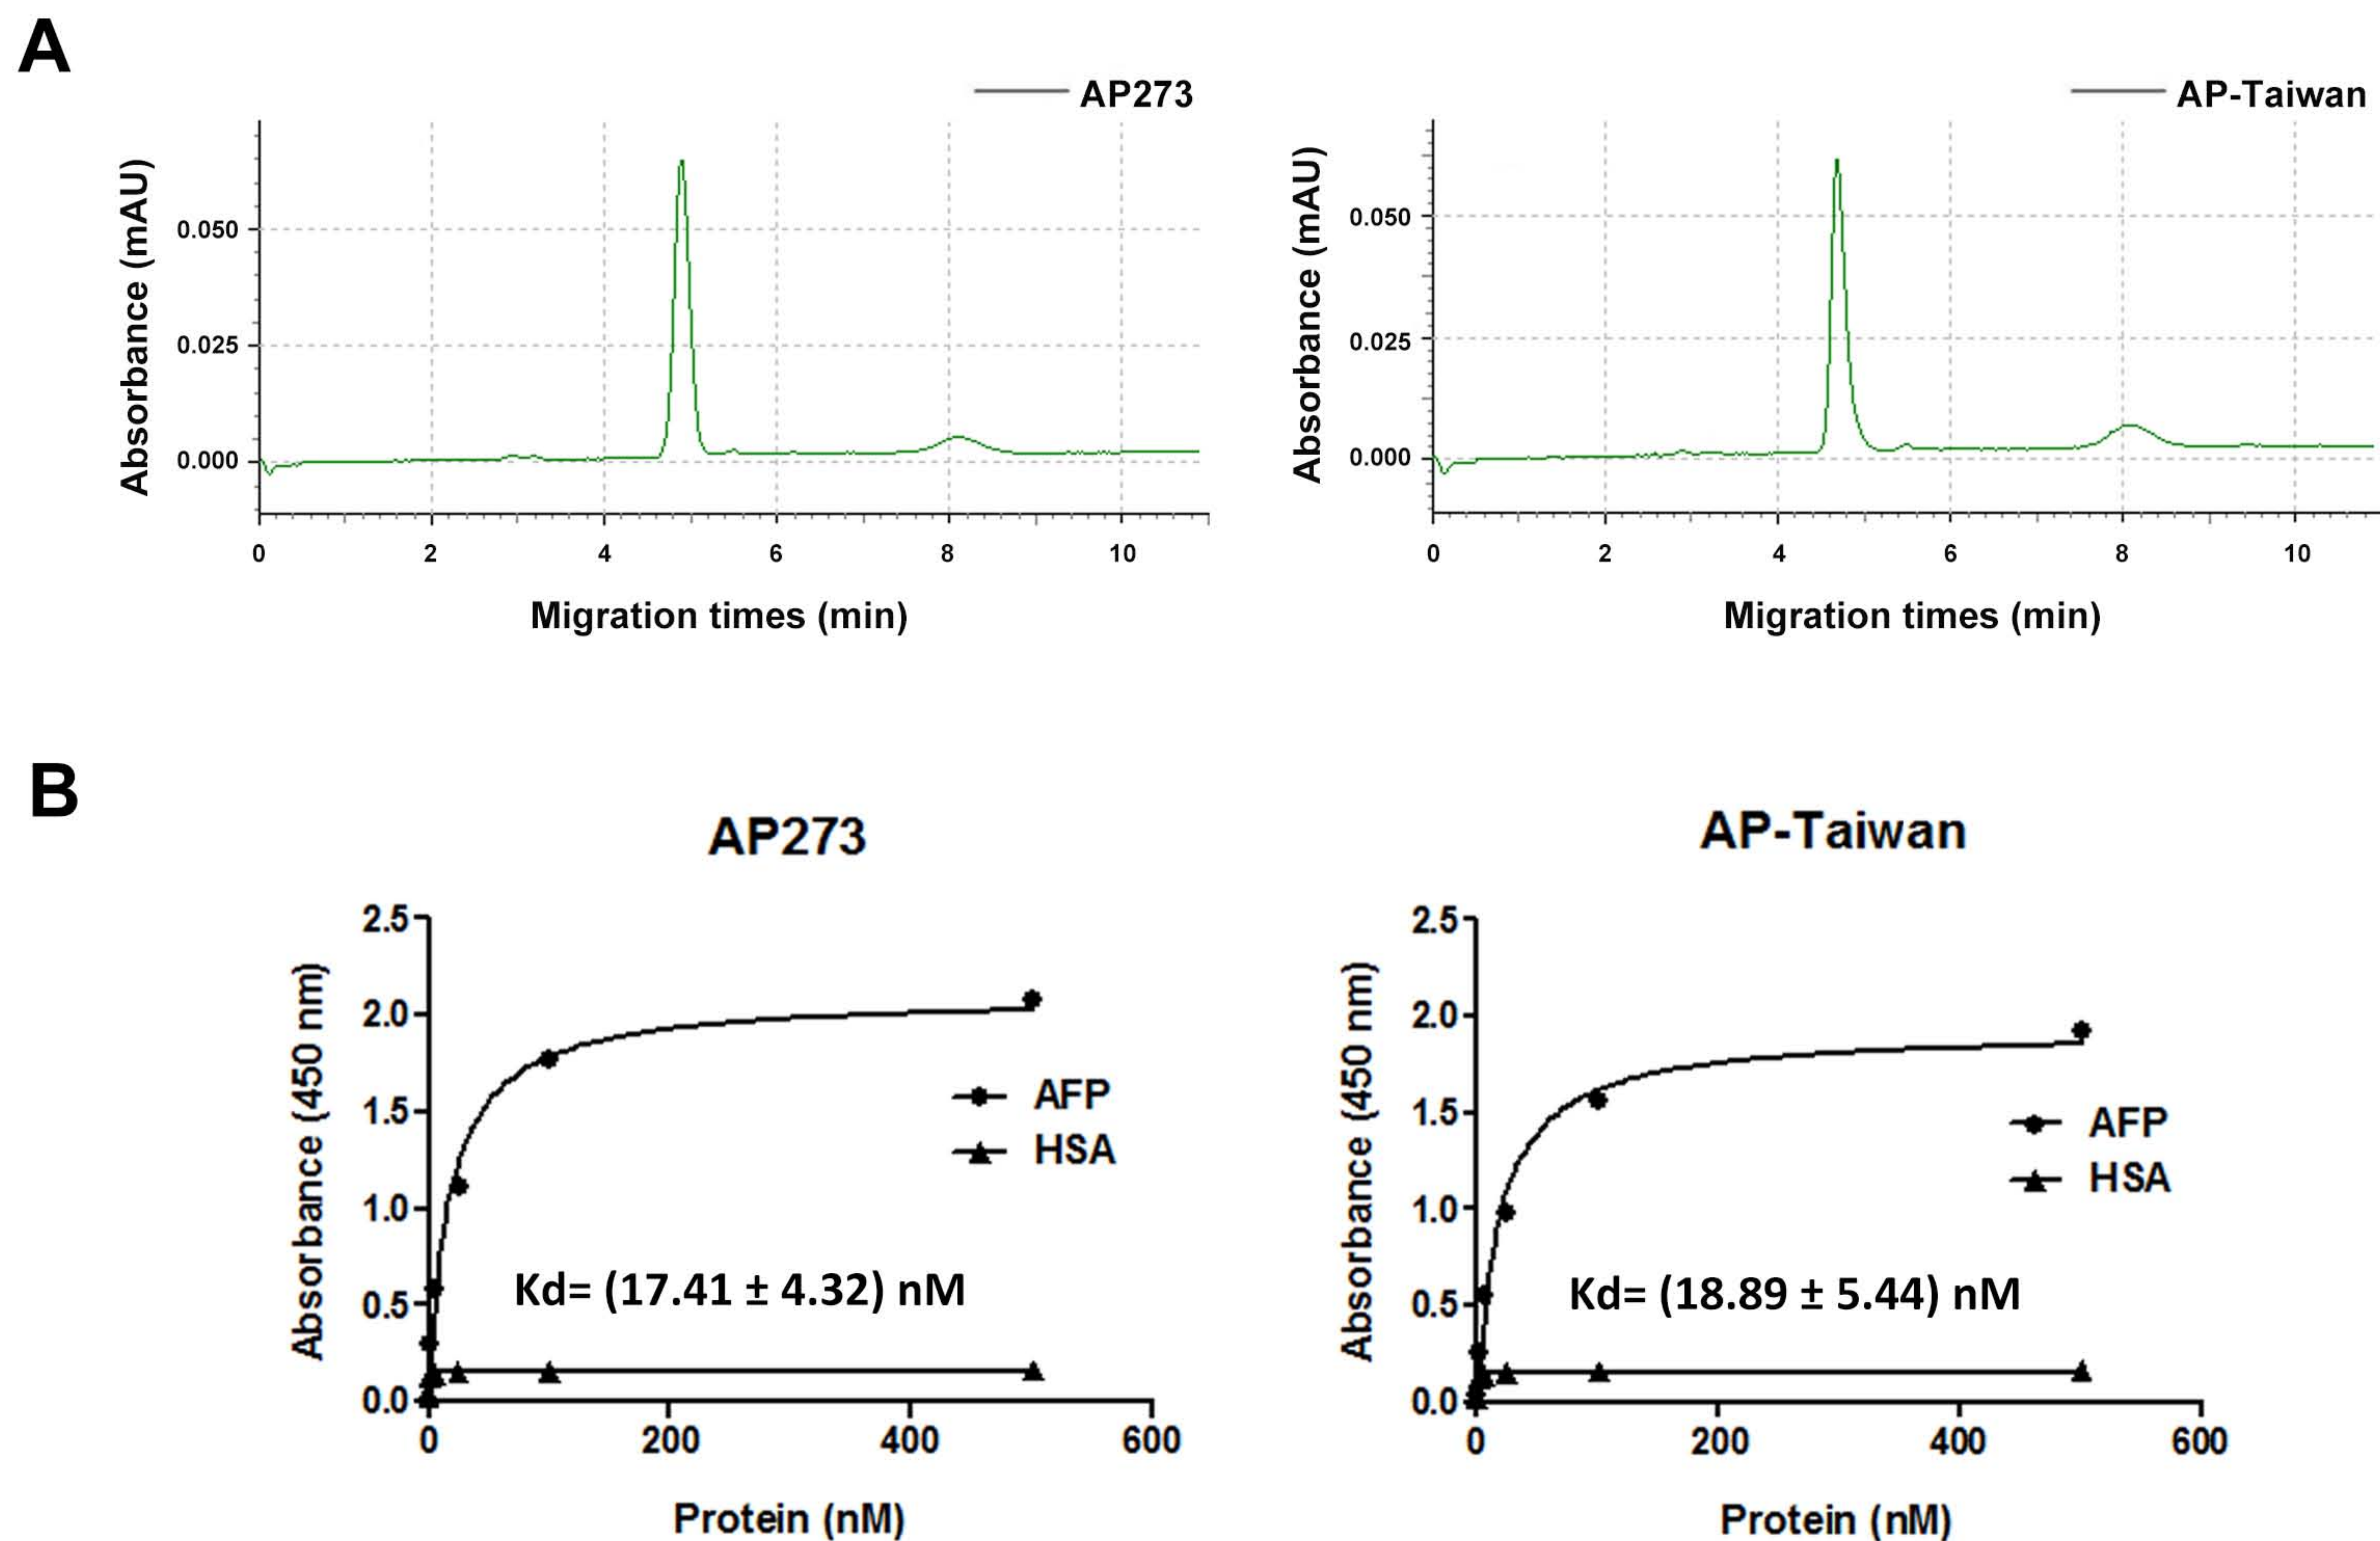

**Supplemental Figure 2. Binding affinity evaluation of AP273 and AP-Taiwan**

(A) Comparison between AP273 and AP-Taiwan using CE assays. Both of these aptamers run the similar peaks. (B) The microplate testing analysis of the comparison between AP273 and AP-Taiwan. The 96-well microplate was coated with AP273 or AP-Taiwan and pre-blocked with non-specific aptamers. A volume of 100  $\mu$ l of AFP or human serum albumin (HSA) protein (as the negative control) of different concentrations (500 nM, 100 nM, 25 nM, 5 nM, 1 nM, 0 nM) was added to each well and incubated for 1h. After blocking with 3% BSA for 2 h, the plate was incubated with bio-labeled Anti-AFP antibody for 1 h. After washing 3 times, the streptavidin-horseradish peroxidase (SA-HRP) was added and incubated for 30 min, followed by washing. The plate was then added to substrate TMB for colorimetric detection on 450 nm. The titration curves were obtained based on above data and the equation  $Y = B_{max}X / (K_d + X)$  was used to calculate the  $K_d$  according to GraphPad Prism 5.0. Y represented the mean value of OD450 nm,  $B_{max}$  was the maximal value of OD450 nm, and X was the concentration of the protein. Compared to HSA, AP273 and AP-Taiwan all can bind AFP specifically and the  $K_d$  values with AFP were  $17.41 \pm 4.32$  nM and  $18.89 \pm 5.44$  nM, respectively.



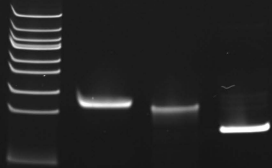

Supplement: srep15552-s1.pdf [file srep15552-s1.pdf]
